# Supplementary figures and images for: Complete Chloroplast Genome Sequence of Fortunella venosa (Champ. ex Benth.) C.C.Huang (Rutaceae): Comparative Analysis, Phylogenetic Relationships, and Robust Support for Its Status as an Independent Species
Source: MDPI journal article supplement (doi:10.3390/f12080996), 2021-07-27

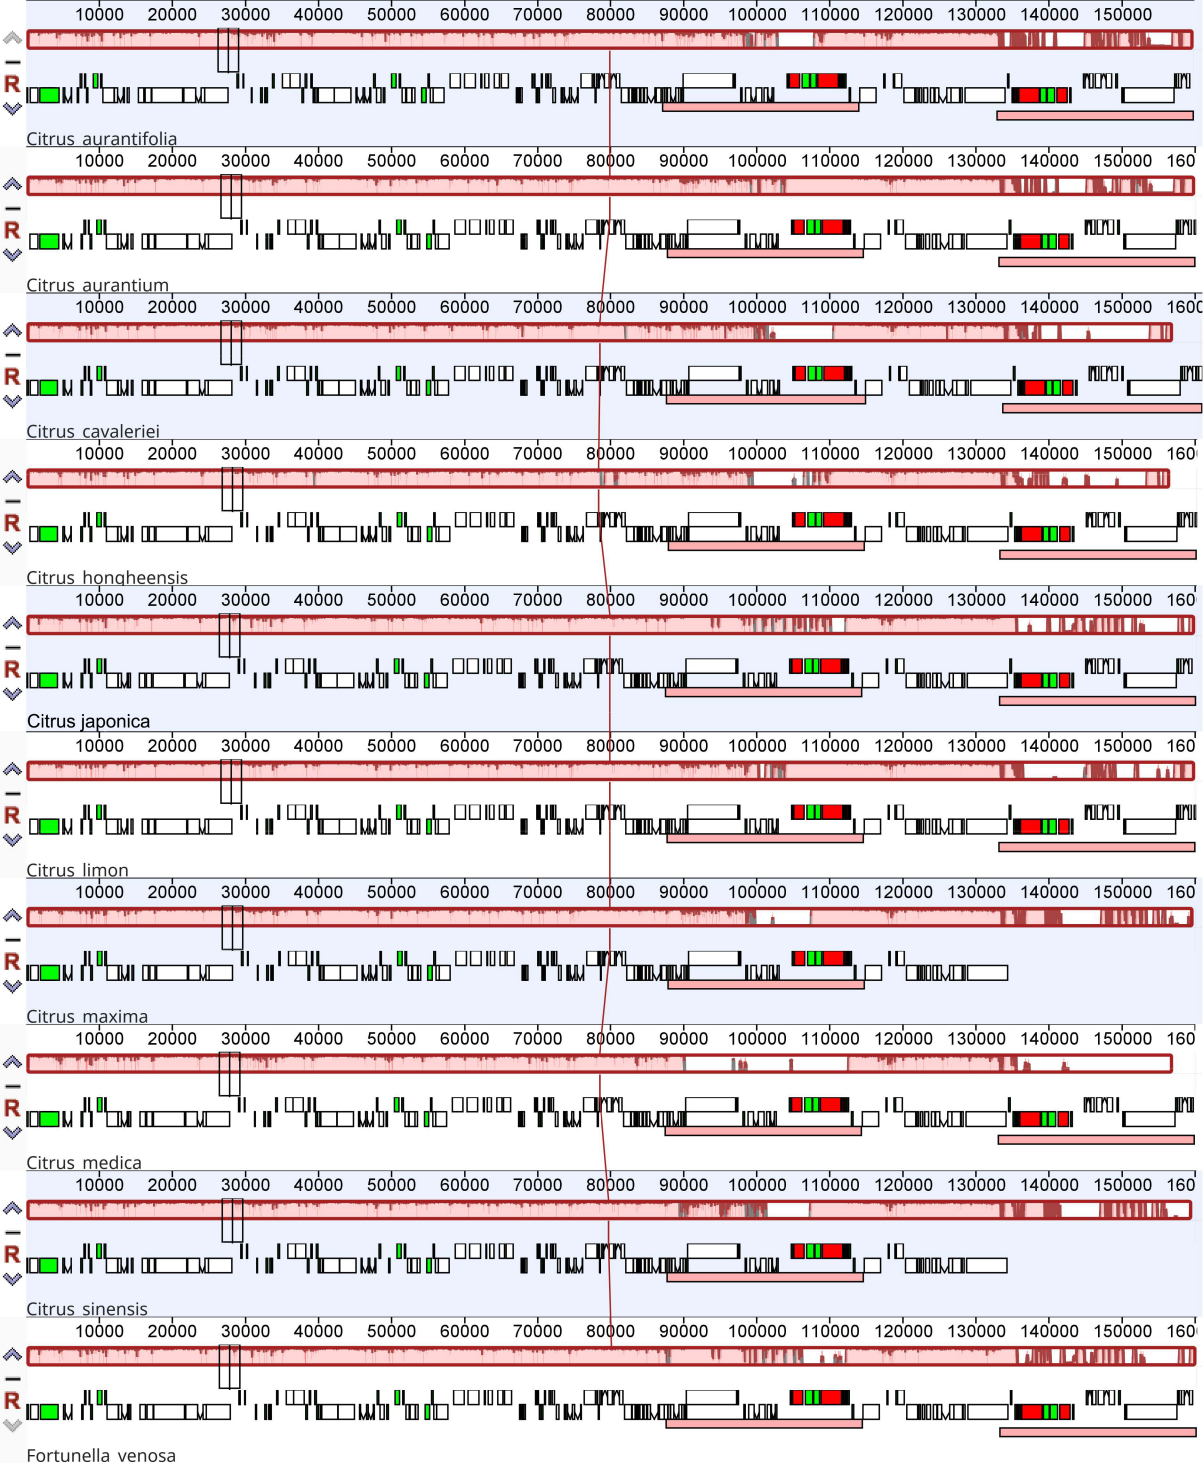

Supplement: s1 [file s1]
